# Supplementary material
Source: Springer Nature journal article supplement (https://www.springermedizin.de/resource/supplementary/12884_2012_950_MOESM1_ESM.pdf/9459296)
Supplement: MOESM1 [file 9459296]

Characteristics of pregnant mothers attending ANC/PMTCT, 2011.

| Variable                              | Mother accompanied by her partner |            | Total      |
|---------------------------------------|-----------------------------------|------------|------------|
|                                       | Yes                               | No         |            |
| <b>Level of education</b>             |                                   |            |            |
| Unable to read and write              | 10(10.5)                          | 59(15.6)   | 69(14.6)   |
| Able to read and write                | 4(3.4)                            | 13(4.1)    | 17(3.6)    |
| Primary education                     | 34(35.8)                          | 165(43.7)  | 199(42.1)  |
| Secondary education                   | 32(33.7)                          | 100(26.5)  | 132(27.9)  |
| Post secondary education              | 15(15.9)                          | 41(10.8)   | 56(11.8)   |
| Total                                 | 95(100.0)                         | 378(100.0) | 473(100.0) |
| <b>No of ANC visits</b>               |                                   |            |            |
| One visit                             | 27(28.4)                          | 131(34.7)  | 158(33.4)  |
| Two visit                             | 35(36.8)                          | 131(34.7)  | 166(35.1)  |
| Three visit                           | 22(23.2)                          | 69(18.3)   | 91(19.2)   |
| Four and above                        | 11(11.6)                          | 47(12.4)   | 58(12.3)   |
| Total                                 | 95(100.0)                         | 378(100.0) | 473(100.0) |
| <b>Marital status</b>                 |                                   |            |            |
| Currently married                     | 70(73.7)                          | 247(65.3)  | 317(67.0)  |
| Living with a man but not married     | 23(24.2)                          | 90(23.8)   | 113(23.9)  |
| Not living together but not separated | 2(2.1)                            | 41(10.8)   | 43(9.1)    |
| Total                                 | 95(100.0)                         | 378(100.0) | 473(100.0) |

**Table 2: Association between male partner involvement in ANC/PMTCT and each explanatory variable (Crude & adjusted OR), Mekelle, Northern Ethiopia, 2011**

| Variable                                                          | Mother accompanied by her husband |                       | COR with 95% CI          | AOR with 95% CI   |
|-------------------------------------------------------------------|-----------------------------------|-----------------------|--------------------------|-------------------|
|                                                                   | Yes n=95                          | No n=378              |                          |                   |
|                                                                   | No (%)                            | No (%)                |                          |                   |
| <b>Knowledge of their sero status</b>                             |                                   |                       |                          |                   |
| Know her sero status                                              | 93(97.9)                          | 353(93.4)             | 0.4(0.25,0.8)            | 0.4(0.18,0.7)**   |
| Didn't know her sero status                                       | 2(2.1)                            | 25(6.6)               | 1.00                     |                   |
| <b>Male partner as the first person to share HIV test results</b> |                                   |                       |                          |                   |
| Yes                                                               | 2(2.1)                            | 353(93.4)             | 3.3(0.8,14.2)            | 1.4(0.28,6.6)     |
| No                                                                | 93(97.9)                          | 25(6.6)               | 1.00                     |                   |
| <b>Ever tested and counseled with their husband</b>               |                                   |                       |                          |                   |
| Yes                                                               | 83(87.4)                          | 208(55.0)             | 5.7(3.0,10.7)*           | 4.7(2.32,9.4)**   |
| No                                                                | 12(12.6)                          | 170(45.0)             | 1.00                     |                   |
| <b>Husband informed about the availability of VCT at the ANC</b>  |                                   |                       |                          |                   |
| Yes                                                               |                                   |                       |                          |                   |
| No                                                                | 90(94.7)<br>5(5.3)                | 292(77.3)<br>86(22.7) | 5.24(2.06,13.3)*<br>1.00 | 3.74(1.38,10.2)** |
